# Supplementary material for: A thin-reflector microfluidic resonator for continuous-flow concentration of microorganisms: a new approach to water quality analysis using acoustofluidics
Source: Royal Society of Chemistry journal article supplement (doi:10.1039/c4lc00577e), 2014-01-01
Supplement: c4lc00577e1.pdf [file c4lc00577e1.pdf]

## Electronic Supplementary Information (ESI) for:

### **A thin-reflector microfluidic resonator for continuous-flow concentration of microorganisms: a new approach to water quality analysis using acoustofluidics**

*Dario Carugo,<sup>a,b</sup> Tobias Octon,<sup>b</sup> Walid Messaoudi,<sup>b</sup> Adam L. Fisher,<sup>c</sup> Michele Carboni,<sup>c</sup> Nick R. Harris,<sup>d</sup> Martyn Hill<sup>b,e</sup> and Peter Glynne-Jones<sup>b,\*</sup>*

<sup>a</sup> Bioengineering Science Group, Faculty of Engineering and the Environment, University of Southampton, Southampton SO17 1BJ, UK

<sup>b</sup> Electro-Mechanical Engineering Group, Faculty of Engineering and the Environment, University of Southampton, Southampton SO17 1BJ, UK

<sup>c</sup> School of Chemistry, University of Southampton, Southampton SO17 1BJ, UK

<sup>d</sup> School of Electronics and Computer Science (ECS), University of Southampton, Southampton SO17 1BJ, UK

<sup>e</sup> Institute for Life Sciences (IfLS), University of Southampton, Southampton SO17 1BJ, UK

**\* Correspondence to:** Dr Peter Glynne-Jones  
Address: Electro-Mechanical Engineering Group, Faculty of Engineering and the Environment  
University of Southampton, Southampton SO17 1BJ, UK  
Telephone: 00 44 2380 595769  
E-mail: P.Glynne-Jones@soton.ac.uk

## **S1 Bacteria culturing and sample preparation**

### **S1.1 *Escherichia coli***

*E. coli* is a Gram-negative rod-shaped bacterium, approximately 2.0  $\mu\text{m}$  long and 0.5  $\mu\text{m}$  in diameter,<sup>2</sup> with an average cell volume of 0.6–0.7  $\mu\text{m}^3$  which is equivalent to a spherical particle of 1.05-1.10  $\mu\text{m}$  diameter.

Bacteria were routinely cultured on sterile lysogeny broth (LB) agar plates (Bio-Rad Laboratories, Inc., USA) and were incubated at 37°C and 5% CO<sub>2</sub> in air with 95% humidity.

Sample preparation was carried out by picking a single colony of *E. coli* K12 from the culture plate by using a sterile inoculation loop (1  $\mu\text{L}$ , Fisher Scientific Ltd., USA), and immersing the loop into a centrifuge tube (50 ml, Fisher Scientific Ltd., USA) filled with 30 ml of LB broth (Sigma Aldrich Corporation, USA). The bacterial culture was subsequently incubated for ~14 hr in an incubator.

For bacteria detection and counting, *E. coli* were fluorescently stained with a bacterial viability kit (LIVE/DEAD® BacLight™, Invitrogen Corporation, USA), a rapid staining method for direct enumeration of viable and total bacteria in drinking water.<sup>3</sup> Briefly, the bacterial culture was centrifuged at 3000 rpm, for 3 min at 20°C. The supernatant was aspirated with a micropipette and replaced with a solution of 5 mM SYTO9 in Phosphate Buffered Saline (PBS) (2:1000 by volume). Bacteria were incubated at 37°C for 25 min, followed by centrifugation and washing with fresh PBS. The washed bacterial pellet was resuspended in PBS at a concentration of  $\sim 2 \times 10^4$  CFU/ml. SYTO9 stained the nucleic acid of all bacteria in the suspension, and produced a green fluorescence.

## **S1.2 *Staphylococcus epidermidis***

*S. epidermidis* is a Gram-positive spherical-shaped bacterium (referred to as coccus). The average diameter is in the range 0.5–1.5  $\mu\text{m}$ ,<sup>4</sup> with an average cell volume of 0.52  $\mu\text{m}^3$ .

Sample preparation was carried out as follows. Firstly, a 15 ml capacity falcon tube containing 8 ml of Tryptic Soy Broth (TSB) (Sigma Aldrich, UK) was inoculated with a single colony of *S. epidermidis* ATCC 12228, and grown over night (~14 hr) at 37°C.

As with *E. coli*, bacteria were fluorescently stained with using a cell viability kit (LIVE/DEAD® BacLight™, Invitrogen Corporation, USA). For this purpose, the bacterial culture was centrifuged at 3000 rpm, for 3 min at 20°C. The supernatant was aspirated with a micropipette and replaced with a solution of 5 mM SYTO9 in Phosphate Buffered Saline (PBS) (2:1000 by volume). Bacteria were incubated at 37°C for 25 min, followed by centrifugation and washing with fresh PBS. The washed bacterial pellet was resuspended in PBS at a concentration of  $\sim 2 \times 10^4$  CFU/ml.

## **S2 Device Priming**

In order to prevent bubbles formation during device priming, sequential flushing cycles of 100% CO<sub>2</sub> and ultrapure water (Milli-Q, EMD Millipore Corporation, USA) were performed. After each cycle, any remaining CO<sub>2</sub> dissolves in the water. Multiple cycles are required to ensure that any original gases are eliminated. On average 3 and 6 cycles were required for HW and TR resonators, respectively. 100% CO<sub>2</sub> was manually injected into the device using a 20 ml plastic syringe (Terumo Corporation, Japan) at an estimated average injection pressure and flow rate of ~11 kPa and ~0.75 ml/s, respectively. In order to ensure that all parts of the device were flushed with CO<sub>2</sub>, each individual outlet line was sequentially opened whilst the others remained closed.

### S3 Stabilisation of the reflector layer in TR devices

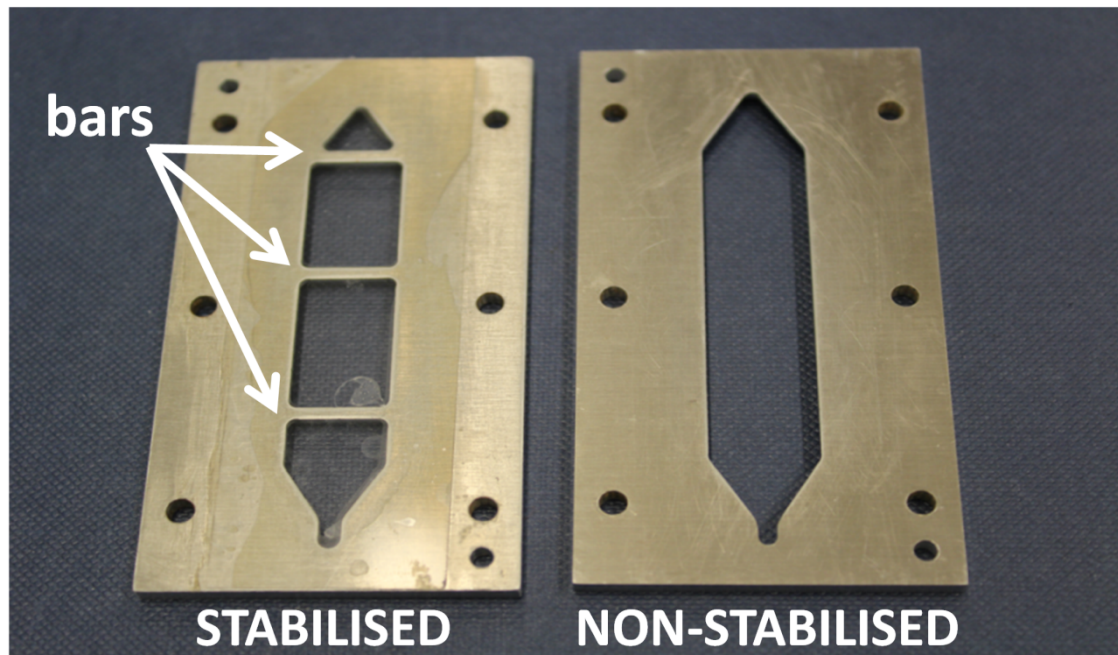

**Fig. S3 Stabilisation of the reflector layer in TR devices.** In order to counteract potential bending of the reflector layer in TR devices, three transversal bars (white arrow) were added to the metal frame (left). Bars were ~1.5 mm wide, and crossed the entire width of the fluidic chamber. A bars-free metal frame is reported on the right, which corresponded to a non-stabilised reflector layer. Circular holes have been milled in the frame, allowing for alignment with the other layers of the device.

## References

1. D.-C. Seo, A. A. H. Siddique, B. Ahn, C. G. Kim and S. H. Cho, *Journal of Mechanical Science and Technology*, 2013, **27**, 825-830.
2. H. Kubitschek, *Journal of bacteriology*, 1990, **172**, 94-101.
3. L. Boulos, M. Prevost, B. Barbeau, J. Coallier and R. Desjardins, *Journal of microbiological methods*, 1999, **37**, 77-86.
4. B. A. Wilson, A. A. Salyers, D. D. Whitt and M. E. Winkler, *Bacterial pathogenesis: A molecular approach*, American Society for Microbiology (ASM), 2011.
